## STUDY PROTOCOL

# Dyadic care to improve postnatal outcomes of birthing people and their infants: A scoping review protocol

Courtney C. Choy<sup>1</sup>, Molly E. McAdow<sup>2</sup>, Julia Rosenberg<sup>3</sup>, Alyssa A. Grimshaw<sup>4</sup>, Josefa L. Martinez-Brockman<sup>5\*</sup>

**1** Department of Chronic Disease Epidemiology, Yale School of Public Health, New Haven, Connecticut, United States of America, **2** Department of Obstetrics, Gynecology, and Reproductive Sciences, Yale School of Medicine, New Haven, Connecticut, United States of America, **3** Department of Pediatrics, Yale University School of Medicine, New Haven, Connecticut, United States of America, **4** Harvey Cushing/John Hay Whitney Medical Library, Yale University, New Haven, Connecticut, United States of America, **5** Department of General Internal Medicine, Yale School of Medicine, New Haven, Connecticut, United States of America

\* [josefa.martinez@yale.edu](mailto:josefa.martinez@yale.edu)

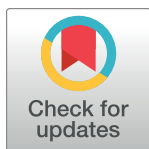

## OPEN ACCESS

**Citation:** Choy CC, McAdow ME, Rosenberg J, Grimshaw AA, Martinez-Brockman JL (2024) Dyadic care to improve postnatal outcomes of birthing people and their infants: A scoping review protocol. PLoS ONE 19(4): e0298927. <https://doi.org/10.1371/journal.pone.0298927>

**Editor:** Abel Fekadu Dadi, Menzies School of Health Research, AUSTRALIA

**Received:** August 1, 2023

**Accepted:** January 30, 2024

**Published:** April 16, 2024

**Copyright:** © 2024 Choy et al. This is an open access article distributed under the terms of the [Creative Commons Attribution License](https://creativecommons.org/licenses/by/4.0/), which permits unrestricted use, distribution, and reproduction in any medium, provided the original author and source are credited.

**Data Availability Statement:** No datasets were generated or analyzed during the current study. All relevant data from this study will be made available upon study completion. The protocol and search strategy have been posted on the Open Science Framework (OSF, <https://osf.io/5fs6e/>).

**Funding:** This publication was made possible through support from the Clinical and Translational Science Awards (CTSA) Program Grant Numbers TL1 TR001864 (CCC) and KL2 TR001862 (MEM, JR, JMB) from the National Center for Advancing

## Abstract

### Introduction

Dyadic care, which is the concurrent provision of care for a birthing person and their infant, is an approach that may improve disparities in postnatal health outcomes, but no synthesis of existing dyadic care studies has been conducted. This scoping review seeks to identify and summarize: 1) dyadic care studies globally, in which the birthing person-infant dyad are cared for together, 2) postnatal health outcomes that have been evaluated following dyadic care interventions, and 3) research and practice gaps in the implementation, dissemination, and effectiveness of dyadic care to reduce healthcare disparities.

### Materials and methods

Eligible studies will (1) include dyadic care instances for the birthing person and infant, and 2) report clinical outcomes for at least one member of the dyad or intervention outcomes. Studies will be excluded if they pertain to routine obstetric care, do not present original data, and/or are not available in English or Spanish. We will search CINAHL, Ovid (both Embase and Medline), Scopus, Cochrane Library, PubMed, Google Scholar, Global Health, Web of Science Core Collection, gray literature, and WHO regional databases. Screening will be conducted via Covidence and data will be extracted to capture the study design, dyad characteristics, clinical outcomes, and implementation outcomes. The risk of bias will be assessed using the Joanna Briggs Institute Critical Appraisal Tool. A narrative synthesis of the study findings will be presented.

### Discussion

This scoping review will summarize birthing person-infant dyadic care interventions that have been studied and the evidence for their effectiveness. This aggregation of existing data can be used by healthcare systems working to improve healthcare delivery to their

Translational Science ([ncats.nih.gov](https://ncats.nih.gov)), a component of the National Institute of Health (NIH). MEM is also supported by the Foundation for the Society for Maternal-Fetal Medicine/American Association of Obstetricians and Gynecologists Foundation Scholar Award and the Albert McKern Award. The contents of this manuscript are solely the responsibility of the authors and do not represent the official views of NIH. The funders did not have a role in the study design, data collection, analysis, decision to publish, or preparation of the manuscript.

**Competing interests:** The authors have declared that no competing interests exist.

patients with the aim of reducing postnatal morbidity and mortality. Areas for future research will also be highlighted.

## Trail registration

This review has been registered at Open Science Framework (OSF, <https://osf.io/5fs6e/>).

## Introduction

The postnatal period, often referred to as the “fourth trimester,” is a critical time to support and improve the health outcomes of birthing people and their infants [1, 2]. Pregnancy-related morbidity and mortality often occurs in the 6-week postpartum period, and adverse events during this period are frequently secondary to preventable causes, including depression and suicide, hypertensive disorders, and thromboembolic events [3–5]. Despite these risks, up to half of birthing people in the United States do not attend their visit for postnatal care with a healthcare professional [6]. Health care disparities play a significant role in pregnancy-related morbidity and mortality [7, 8]. In the United States, Black birthing people are three times more likely than White birthing people to die from pregnancy-related complications, and this is partly attributed to difficulties accessing high-quality care [9]. Glazer and colleagues have highlighted that healthcare disparities between the pregnant and postnatal individual and their newborn are interrelated, and the provision of dyadic care may reduce morbidity and mortality risk [10].

While the concurrent provision of care for a birthing person and infant may improve health outcomes, no standard exists for dyadic care either in the United States or globally [11]. A recent (2023) World Health Organization (WHO) postnatal care model places the birthing person-infant dyad at the center of care, with continuous care in the first 24 hours after birth and a minimum of three additional postnatal care contacts [12]. The American Academy of Pediatrics recommends prenatal visits to establish pediatric medical homes and postnatal depression screening for the birthing person during pediatric visits [13]. The American College of Obstetricians and Gynecologists endorses earlier and more expansive postnatal care including assessment of infant care and feeding [14]. Continued postnatal support from family and health services is critical to ensure positive outcomes and requires a combination of supplies, infrastructure, effective referral systems, and respectful, individualized, person-centered care. A key endpoint of the dyadic care model is a ‘positive postnatal experience’ for all birthing people, newborns, parents, caregivers, and families after birth, which will in turn, provide a stronger foundation for improved health outcomes across the life course [12].

The scope and variety of birthing person-infant dyadic care models are not described in societal guidelines. Based on a preliminary search in Embase, no reviews of dyadic care for birthing people and infants were published nor reported as ongoing. Additional searches in PROSPERO and Open Science Framework resulted in no relevant dyadic care model protocols. A synthesis of previously studied models could inform healthcare systems on interventions to reduce pregnancy-related morbidity and mortality.

Here, we describe a scoping review protocol to synthesize original studies and reports that discuss dyadic care and address postnatal health outcomes globally. We will apply the framework described by Glazer and colleagues to define perinatal dyadic care as medical encounters where both the birthing person and the infant receive care at the same time, making it easier for the dyad to receive essential postnatal care [10].

1. We aim to identify dyadic care models that may be replicated and/or adapted for use through the following questions: What models of birthing person-infant dyadic care have been described in published original studies and reports?
2. How were the birthing person and infant dyad characteristics and outcomes measured and defined?
3. What evidence supports the clinical efficacy of dyadic approaches to care?
4. What research knowledge and practice gaps remain in the existing literature for future investigations?

This scoping review will highlight promising practices and future areas for research regarding dyadic postnatal care, which has the potential to reduce healthcare disparities and improve health outcomes.

## Materials and methods

This protocol for the scoping review is shared on the Open Science Framework (<https://osf.io/5fs6e/>) and aligns with guidelines provided by the Preferred Reporting Items for Systematic Review and Meta-Analysis Protocols (PRISMA-P) Statement ([S1 Checklist](#)). When completed, the scoping review will be reported according to guidance from the Preferred Reporting Items for Scoping Review (PRISMA ScR) and Joanna Briggs Institute Manual for Evidence Synthesis [15–19]. This scoping review protocol was written in accordance with the Preferred Reporting Items for Systematic Review and Meta-Analysis Protocols ([S1 Checklist](#) PRISMA-P). We will provide details of any amendment made after publication, including, but not limited to, date and description of the change(s) with a rationale in the future.

## Eligibility criteria

Studies will be included if they fulfill the following criteria:

**Study inclusion and exclusion criteria.** Studies will include models of medical care in which both the birthing person (including pregnant and up to 1-year postpartum) and the neonate or infant aged 0 up to 1 year-old receive medical care in the same instance. The instances of dyadic care may include, but are not limited to, pregnancy, postpartum, lactation, and infant care settings. Dyadic interventions during pregnancy will be included if they represent novel approaches to improve neonatal outcomes beyond standard obstetric care. Studies will be excluded if they pertain to routine obstetric management of labor and delivery, quality metrics related to routine obstetric management of labor and delivery, and/or parenting practices without explicit care of the birthing person.

We will use the following screening questions to evaluate inclusion and exclusion criteria:

Include if yes to all:

1. Were the birthing person (including pregnant and up to 1-year postpartum) and neonate/infant (aged 0 to 1 year old) cared for or evaluated in the same encounter?
2. Was an outcome of either the birthing person or the neonate/infant measured or reported (e.g., clinical health, intervention, and/or implementation outcome)?
3. Does the article include original scientific data (e.g., not a review or meta-analysis)?

Exclude if yes:

4. Does the study pertain to obstetric management of labor and delivery and/or quality metrics related to obstetric management of labor and delivery?

**Publication date.** We will include all relevant studies published with no year limitations.

**Publication types.** This scoping review will include both peer-reviewed articles and gray literature to represent the work in the field of dyadic care globally. Conference abstracts, systematic reviews, and meta-analyses will not be included. Conference abstracts will be excluded because studies have found preliminary data often differs from published manuscript data [20, 21].

**Study setting/context.** Studies from all geographic locations will be included. All locations of care delivery will be considered including outpatient visits, inpatient admissions, and home-based care.

**Language and terminology.** Studies published in English and Spanish will be included because one member of the study team (JMB) is fluent in both languages. If the title and abstract are in English or Spanish and it passes title/abstract screening, but the full text is written in a different language, we will search for an English translation. If a translated version cannot be obtained, we will exclude the study in the full-text screen.

**Terminology considerations.** Throughout literature, female-gendered parental terminology (e.g., mother, maternal, breastfeeding) is often used to describe birthing people [22–24]. While our search strategy will include gendered and gender-inclusive terminology, we will use gender-neutral terminology (e.g., birthing person, breast/chestfeeding) in this protocol and future publications.

## Search strategy

We developed a search strategy using controlled vocabulary and keywords that envisioned three potential settings/models where dyadic care may occur: 1) Dyadic models of care (including shared care and appointments); 2) Postpartum and postnatal care encounters (including birthing person/mother, infant/child, postpartum, and postnatal terms); and 3) Birthing person and infant/child services. Our search strategy for Embase is shown (Table 1). Following the Peer Review of Electronic Search Strategies (PRESS) procedure [25], an independent health sciences librarian reviewed our strategy.

**Information sources.** The following nine databases will be searched: CINAHL, Ovid (both Embase and Medline), Scopus, Cochrane Library, PubMed, Google Scholar, Global Health, Web of Science Core Collection to find relevant articles from the inception of the database to the final search date [26]. CitationChaser will be used to find any additional relevant articles not retrieved by database searches that were cited by included studies [27]. The initial search was conducted on December 19, 2022 and according to best practices will be updated within six months of publication and as necessary [19].

In addition to the databases searches, we will manually search Google using the key concepts described above. A study investigator will review the first 10 pages of results retrieved within Google. These searches will be used to retrieve gray literature reports of dyadic care models. Additional site-specific Google searches will be performed for international agencies, such as the World Health Organization.

## Data management

The search results will be preserved in an Endnote 20 (Clarivate Analytics LLC, Philadelphia, PA) file. Screening data will be preserved in Covidence (Covidence, Melbourne VIC Australia) to deduplicate and screen articles. The identification and selection process of articles will be illustrated with a PRISMA flowchart.

The criteria for the exclusion and inclusion of articles were piloted prior to the screening of the title-abstracts. To pilot the criteria, four authors reviewed 50 records and made decisions (either yes or no) to include the title-abstract for full-text screening. If there were

**Table 1. Search strategy in Embase.**

Search Results from 12/19/2022

**Dyadic Models of Care**

- 1 shared medical appointment/
- 2 (dyad\* adj3 (intervention\* or therap\* or treatment\* or care or healthcare or appointment\* or strag\* or model\* or follow-up\* or appointment\* or consultation\* or visit\*)).tw,kf.
- 3 (dual adj3 (appointment\* or care\* or healthcare\* or consultation\* or follow-up\*)).tw,kf.
- 4 ((family or shared) adj3 (appointment\* or consultation\* or visit\* or follow-up\*)).tw,kf.
- 5 or/1-4

**Postpartum and Postnatal Care**

- 6 exp postnatal care/
- 7 exp perinatal care/
- 8 exp prenatal care/
- 9 kangaroo care/
- 10 exp breast feeding/
- 11 (after-birth\* or afterbirth\* or antenatal\* or ante-natal or antepartum\* or ante-partum\* or birth\* or breastfeed\* or breast-feed\* or childbirth\* or intranatal\* or intra-natal\* or intrapartum\* or intra-partum\* or kangaroo\* or lactat\* or maternal or maternity or natal\* or neonatal\* or parenting or parturient\* or parturition or perinatal\* or post-labor\* or post-labour\* or preconcept\* or pregnan\* or post-partum\* or postpartum\* or postnatal\* or post-natal\* or prenatal or pre-natal or puerperal\* or puerperant\* or puerperium\* or trimester\*).tw,kf.
- 12 ((mother\* or parent\* or father\* or caregiver\* or maternal or paternal) adj3 (infant\* or child\* or neonat\* or fetus\* or fetal\* or baby or babies or newborn\*)).tw,kf.
- 13 or/6-12

**Birthing Person & Infant/Child Services**

- 14 ((care or healthcare or service\*) adj3 (mother\* or parent\* or father\* or caregiver\* or birthing person\* or maternal or paternal or guardian\*) adj1 (infant\* or child\* or neonat\* or baby or babies or fetus\* or fetal\* or newborn\*)).ti.

**Combining Concepts**

- 15 5 and 13
- 16 14 or 15

<https://doi.org/10.1371/journal.pone.0298927.t001>

disagreements among the authors, their interpretation of the criteria was discussed to achieve a consensus. Inclusion and exclusion criteria were further refined and finalized after discussions with the full authorship team.

The screening process will involve two phases using Covidence. Titles and abstracts for each article will be screened by two independent co-investigators to determine articles for inclusion, for exclusion, or for which the full text is required to determine eligibility. Subsequently, full text screening will be conducted by two independent co-investigators. The investigation team will discuss any disagreements to reach consensus on whether to include or exclude the article. Any reason for exclusion of an article will be documented at full-text screening phase.

**Data extraction process.** We will extract data from all eligible articles. Data extraction and quality assessment results will be collected through Qualtrics and preserved in Excel. Data extraction for each article will be performed by two independent co-investigators with a third independent co-investigator resolving conflicts. Data extraction categories are listed in [Table 2](#). We will use a customized sheet to collect all the relevant information to the aim of this scoping review. This data extraction sheet will be piloted with several articles and modified as necessary to include all the relevant information of the included articles. All study data will be preserved for three years after publication or longer if deemed appropriate by the publishing journal's data management policy.

**Patient and public involvement.** To draft and administer this scoping review protocol, patients and the public are not involved. This scoping review will summarize original scientific articles and other article types (e.g., brief research reports) and this may include information about patients and the public.

**Table 2. Data extraction categories.**


---

|                                                                                                                                                                                                 |
|-------------------------------------------------------------------------------------------------------------------------------------------------------------------------------------------------|
| Publication information                                                                                                                                                                         |
| • Citation year and first author                                                                                                                                                                |
| • Type (e.g., original research article, report)                                                                                                                                                |
| • Funding source                                                                                                                                                                                |
| Study setting                                                                                                                                                                                   |
| • Country location                                                                                                                                                                              |
| • Data source                                                                                                                                                                                   |
| Study characteristics                                                                                                                                                                           |
| • Objective(s)                                                                                                                                                                                  |
| • Study design (e.g., observational, randomized control trial, cross-sectional, etc)                                                                                                            |
| • Timing (e.g., prenatal, delivery admission, postpartum)                                                                                                                                       |
| • Duration of intervention                                                                                                                                                                      |
| • Duration of follow-up                                                                                                                                                                         |
| • Care delivery type (e.g., home visits, outpatient visit)                                                                                                                                      |
| • Implementers of study (e.g., study staff, stakeholders, community health workers, lactation consultants)                                                                                      |
| • Dyadic care model (e.g., shared medical visit, social intervention)                                                                                                                           |
| • Theoretical model of behavior change, if any                                                                                                                                                  |
| • Implementation strategy                                                                                                                                                                       |
| • Evaluation strategy                                                                                                                                                                           |
| Dyad characteristics                                                                                                                                                                            |
| • Sample size (e.g., intervention vs. control groups)                                                                                                                                           |
| • Gestational age of delivered infant                                                                                                                                                           |
| • Trimester of pregnancy and/or duration postpartum                                                                                                                                             |
| • Age (e.g., fetus/infant: <0 months, 0–1 month, 1–6 months, >6 months; caregiver age ranges <18, 18–34, ≥35)                                                                                   |
| • Sex assigned at birth                                                                                                                                                                         |
| • Race and ethnicity                                                                                                                                                                            |
| • Health status                                                                                                                                                                                 |
| Outcomes                                                                                                                                                                                        |
| • Clinical outcomes (e.g., maternal readmission, hypertensive urgency/emergency, wound complication, thromboembolic disease; pediatric outcomes—growth, development, breastfeeding, safe sleep) |
| • Implementation outcomes (e.g., feasibility, acceptability, cost)                                                                                                                              |

---

<https://doi.org/10.1371/journal.pone.0298927.t002>

### Assessment of risk of bias

The Joanna Briggs Institute critical appraisal tools will be used to assess the risk of bias in each included study [28–30]. Studies will be rated by at least two independent reviewers, ratings will be discussed, and discrepancies in ratings will be resolved. Risk of bias ratings will be displayed in the results table. The critical appraisal of the included studies will be used to summarize our confidence in the cumulative evidence.

### Study status and timeline

The gray literature search and screening process are in progress. The search will be re-run at the conclusion of the data extraction and at least six months prior to manuscript submission. We anticipate that this scoping review will be completed by March 2024.

### Presentation of findings

Dyadic care models for birthing people and their infants will be summarized by their characteristics and reported outcomes. Advances in clinical care, as well as gaps in research and clinical practice will be highlighted. Extracted data will be described by country location, study characteristics (e.g., dyadic care model), and quantitative and/or qualitative outcomes. We will develop tables and figures to map and compare the evidence for future research and dyadic care practice and research.

**Ethics and dissemination.** Formal ethical approval is not required for this scoping review that will synthesize existing dyadic care models. For dissemination, we plan to develop a manuscript that includes a comparison and discussion of the identified dyadic care model studies. The findings will be shared through presentations in relevant meetings including those with community groups and peer-reviewed publications.

## Discussion

While standard obstetric and postnatal care have dramatically improved pregnancy outcomes, there remains significant maternal morbidity and mortality, often from preventable causes that disproportionately affect Black birthing people in the United States. Because risk factors for adverse outcomes are shared between the birthing person and infant, dyadic care in which both are cared for together has been proposed as an opportunity to reduce disparities. Existing dyadic care models for birthing people-infant dyads will be identified and summarized in this scoping review. The findings will help to guide and inform healthcare practices and future research to improve the development, implementation, and evaluation of dyadic care models, which are promising opportunities to reduce morbidity and mortality and promote health across the lifespan for both members of the birthing person-infant dyad.

## Strengths and limitations of study design

This scoping review is timely and aligns with WHO's vision for care across the pregnancy, childbirth, and postnatal continuum [12]. The search strategy was planned to capture a diverse range of dyadic care models in different populations in the U.S. and globally. Considering that the terminology for dyadic care is emerging and inconsistently used in the literature to capture this concept, the search will be broad to find all potentially relevant papers. Our methodology includes efforts to ensure relevant papers not identified by the original search are subsequently identified by searching for grey literature with Google and performing citation chasing; however, it is possible that papers may be missed due to the inconsistency of language used. Our study excludes conference abstracts because they have been found to be unreliable and fail to include adequate information [31–33]. We also chose to focus on birthing people and exclude interventions that involve other caregivers. To further improve the methodological reproducibility and rigor of this scoping review, we will comply with guidance from the Joanna Briggs Institute and PRISMA.

## Supporting information

**S1 Checklist. PRISMA-P (Preferred Reporting Items for Systematic review and Meta-Analysis Protocols) 2015 checklist: Recommended items to address in systematic review protocol.**  
(DOCX)

## Acknowledgments

Thank you to the independent librarian Thomas Mead for reviewing the scoping review search strategy.

## Author Contributions

**Conceptualization:** Courtney C. Choy, Molly E. McAdow, Julia Rosenberg, Alyssa A. Grimshaw, Josefa L. Martinez-Brockman.

**Investigation:** Courtney C. Choy, Molly E. McAdow, Julia Rosenberg, Josefa L. Martinez-Brockman.

**Methodology:** Alyssa A. Grimshaw.

**Project administration:** Courtney C. Choy, Molly E. McAdow, Julia Rosenberg, Alyssa A. Grimshaw, Josefa L. Martinez-Brockman.

**Writing – original draft:** Courtney C. Choy.

**Writing – review & editing:** Courtney C. Choy, Molly E. McAdow, Julia Rosenberg, Alyssa A. Grimshaw, Josefa L. Martinez-Brockman.

## References

1. Tully KP, Stuebe AM, Verbiest SB. The fourth trimester: a critical transition period with unmet maternal health needs. *American journal of obstetrics and gynecology*. 2017; 217(1):37–41. <https://doi.org/10.1016/j.ajog.2017.03.032> PMID: 28390671
2. Phillips SE, Celi AC, Wehbe A, Kaduthodil J, Zera CA. Mobilizing the Fourth Trimester to Improve Population Health: Interventions For Postpartum Transitions of Care. *American Journal of Obstetrics and Gynecology*. 2022. <https://doi.org/10.1016/j.ajog.2022.12.309> PMID: 36574875
3. Somer SJH, Sinkey RG, Bryant AS, editors. Epidemiology of racial/ethnic disparities in severe maternal morbidity and mortality. *Seminars in perinatology*; 2017; 41(5):258–265. <https://doi.org/10.1053/j.semperi.2017.04.001> PMID: 28888263
4. Danilack VA, Brousseau EC, Paulo BA, Matteson KA, Clark MA. Characteristics of women without a postpartum checkup among PRAMS participants, 2009–2011. *Maternal and child health journal*. 2019; 23(7):903–909. <https://doi.org/10.1007/s10995-018-02716-x> PMID: 30631991
5. Parikh NI, Gonzalez JM, Anderson CA, Judd SE, Rexrode KM, Hlatky MA, et al. Adverse pregnancy outcomes and cardiovascular disease risk: unique opportunities for cardiovascular disease prevention in women: a scientific statement from the American Heart Association. *Circulation*. 2021; 143(18):e902–e16. <https://doi.org/10.1161/CIR.0000000000000961> PMID: 33779213
6. Walker LO, Francine Nichols R. The broken thread of health promotion and disease prevention for women during the postpartum period. *The Journal of Perinatal Education*. 2015; 24(2):81. <https://doi.org/10.1891/1058-1243.24.2.81> PMID: 26957891
7. Mehta LS, Sharma G, Creanga AA, Hameed AB, Hollier LM, Johnson JC, et al. Call to action: maternal health and saving mothers: a policy statement from the American Heart Association. *Circulation*. 2021; 144(15):e251–e69. <https://doi.org/10.1161/CIR.0000000000001000> PMID: 34493059
8. Petersen EE, Davis NL, Goodman D, Cox S, Syverson C, Seed K, et al. Racial/ethnic disparities in pregnancy-related deaths—United States, 2007–2016. *Morbidity and Mortality Weekly Report*. 2019; 68(35):762. <https://doi.org/10.15585/mmwr.mm6835a3> PMID: 31487273
9. Joseph K, Boutin A, Lisonkova S, Muraca GM, Razaz N, John S, et al. Maternal mortality in the United States: recent trends, current status, and future considerations. *Obstetrics and gynecology*. 2021; 137(5):763. <https://doi.org/10.1097/AOG.0000000000004361> PMID: 33831914
10. Glazer KB, Zeitlin J, Howell EA, editors. Intertwined disparities: Applying the maternal-infant dyad lens to advance perinatal health equity. *Seminars in perinatology*; 2021; 45(4):151410. <https://doi.org/10.1016/j.semperi.2021.151410> PMID: 33865629
11. Interrante JD, Admon LK, Stuebe AM, Kozhimannil KB. After childbirth: better data can help align postpartum needs with a new standard of care. *Women’s Health Issues*. 2022; 32(3):208–12. <https://doi.org/10.1016/j.whi.2021.12.001> PMID: 35031195
12. Wojcieszek AM, Bonet M, Portela A, Althabe F, Bahl R, Chowdhary N, et al. WHO recommendations on maternal and newborn care for a positive postnatal experience: strengthening the maternal and newborn care continuum. *BMJ Global Health*. 2023; 8(Suppl 2):e010992. <https://doi.org/10.1136/bmjgh-2022-010992> PMID: 36717156
13. American Academy of Pediatrics. Maternal Health and Well-being. 2022. Accessed on July 10, 2023. Available from: <https://www.aap.org/en/patient-care/early-childhood/early-childhood-health-and-development/maternal-health-and-well-being/>.
14. ACOG Committee Opinion No. 736: optimizing postpartum care. *Obstetrics & Gynecology*. 2018; 131(5):e140–150. <https://doi.org/10.1097/AOG.0000000000002633> PMID: 29683911



15. Tricco AC, Lillie E, Zarin W, O'Brien KK, Colquhoun H, Levac D, et al. PRISMA extension for scoping reviews (PRISMA-ScR): checklist and explanation. *Annals of internal medicine*. 2018; 169(7):467–73. <https://doi.org/10.7326/M18-0850> PMID: 30178033
16. Peters MD, Godfrey CM, Khalil H, McInerney P, Parker D, Soares CB. Guidance for conducting systematic scoping reviews. *JBIM Evidence Implementation*. 2015; 13(3):141–6. <https://doi.org/10.1097/XEB.000000000000050> PMID: 26134548
17. Munn Z, Peters MD, Stern C, Tufanaru C, McArthur A, Aromataris E. Systematic review or scoping review? Guidance for authors when choosing between a systematic or scoping review approach. *BMJ medical research methodology*. 2018; 18:1–7. <https://doi.org/10.1186/s12874-018-0611-x> PMID: 30453902
18. Rethlefsen ML, Page MJ. PRISMA 2020 and PRISMA-S: common questions on tracking records and the flow diagram. *Journal of the Medical Library Association: JMLA*. 2022; 110(2):253. <https://doi.org/10.5195/jmla.2022.1449> PMID: 35440907
19. Rethlefsen ML, Kirtley S, Waffenschmidt S, Ayala AP, Moher D, Page MJ, et al. PRISMA-S: an extension to the PRISMA statement for reporting literature searches in systematic reviews. *Systematic reviews*. 2021; 10(1):1–19. <https://doi.org/10.1186/s13643-020-01542-z> PMID: 33499930
20. Scherer RW, Saldanha IJ. How should systematic reviewers handle conference abstracts? A view from the trenches. *Systematic reviews*. 2019; 8:1–6. <https://doi.org/10.1186/s13643-019-1188-0> PMID: 31699124
21. Saric L, Vucic K, Dragicevic K, Vrdoljak M, Jakus D, Vuka I, et al. Comparison of conference Abstracts and full-text publications of randomized controlled trials presented at four consecutive world congresses of pain: reporting quality and agreement of results. *European Journal of Pain*. 2019; 23(1):107–16. <https://doi.org/10.1002/ejp.1289> PMID: 29987884
22. Rioux C, Weedon S, London-Nadeau K, Paré A, Juster R-P, Roos LE, et al. Gender-inclusive writing for epidemiological research on pregnancy. *J Epidemiol Community Health*. 2022; 76(9):823–7. <https://doi.org/10.1136/jech-2022-219172> PMID: 35764388
23. American College of Obstetricians and Gynecologists, Committee on Gynecologic Practice, American College of Obstetricians and Gynecologists, Committee on Health Care for Underserved Women. Health care for transgender and gender diverse individuals: ACOG Committee Opinion, Number 823. *Obstetrics and gynecology*. 2021; 137(3):e75–e88. <https://doi.org/10.1097/AOG.0000000000004294> PMID: 33595253
24. Green H, Riddington A. Gender inclusive language in perinatal services: Mission statement and rationale. Brighton, England: Brighton and Sussex University Hospitals. 2020.
25. McGowan J, Sampson M, Salzwedel DM, Cogo E, Foerster V, Lefebvre C. PRESS peer review of electronic search strategies: 2015 guideline statement. *Journal of clinical epidemiology*. 2016; 75:40–6. <https://doi.org/10.1016/j.jclinepi.2016.01.021> PMID: 27005575
26. Bramer WM, Rethlefsen ML, Kleijnen J, Franco OH. Optimal database combinations for literature searches in systematic reviews: a prospective exploratory study. *Systematic reviews*. 2017; 6:1–12. <https://doi.org/10.1186/s13643-017-0644-y> PMID: 29208034
27. Haddaway NR, Grainger MJ, Gray CT. Citationchaser: A tool for transparent and efficient forward and backward citation chasing in systematic searching. *Research Synthesis Methods*. 2022; 13(4):533–45. <https://doi.org/10.1002/jrsm.1563> PMID: 35472127
28. Moola S, Munn Z, Tufanaru C, Aromataris E, Sears K, Sfetcu R, et al. Chapter 7: Systematic reviews of etiology and risk. In: Aromataris E, Munn Z (Editors). *Joanna Briggs Institute Manual for Evidence Synthesis*. 2020. Available from <https://doi.org/10.46658/JBIMES-20-08>
29. Barker TH, Stone JC, Sears K, Klugar M, Tufanaru C, Leonardi-Bee J, et al. The revised JBI critical appraisal tool for the assessment of risk of bias for randomized controlled trials. *JBIM Evidence Synthesis*. 2023; 21(3):494–506. <https://doi.org/10.11124/JBIES-22-00430> PMID: 36727247
30. Tufanaru C, Munn Z, Aromataris E, Campbell J, Hopp L. Chapter 3: Systematic reviews of effectiveness. In: Aromataris E, Munn Z (Editors). *Joanna Briggs Institute Manual for Evidence Synthesis*. JBI, 2020. Available from <https://doi.org/10.46658/JBIMES-20-04>
31. Saldanha IJ, Scherer RW, Rodriguez-Barraquer I, Jampel HD, Dickersin K. Dependability of results in conference abstracts of randomized controlled trials in ophthalmology and author financial conflicts of interest as a factor associated with full publication. *Trials*. 2016; 17(1):1–13. <https://doi.org/10.1186/s13063-016-1343-z> PMID: 27113767
32. Rosmarakis ES, Soteriades ES, Vergidis PI, Kasiakou SK, Falagas ME. From conference abstract to full paper: differences between data presented in conferences and journals. *The FASEB Journal*. 2005; 19(7):673–80. <https://doi.org/10.1096/fj.04-3140lfe> PMID: 15857882

33. Toma M, McAlister FA, Bialy L, Adams D, Vandermeer B, Armstrong PW. Transition from meeting abstract to full-length journal article for randomized controlled trials. *Jama*. 2006; 295(11):1281–7. <https://doi.org/10.1001/jama.295.11.1281> PMID: 16537738
